# Supplementary material for: Identification of MOS9 as an interaction partner for chalcone synthase in the nucleus
Source: PeerJ journal article supplement (doi:10.7717/peerj.5598), 2018-09-19

**A.**

Dataset: 63 anatomical parts from data selection: AT\_AFFY\_ATH1-0  
Showing 4 measure(s) of 4 gene(s) on selection: AT-0

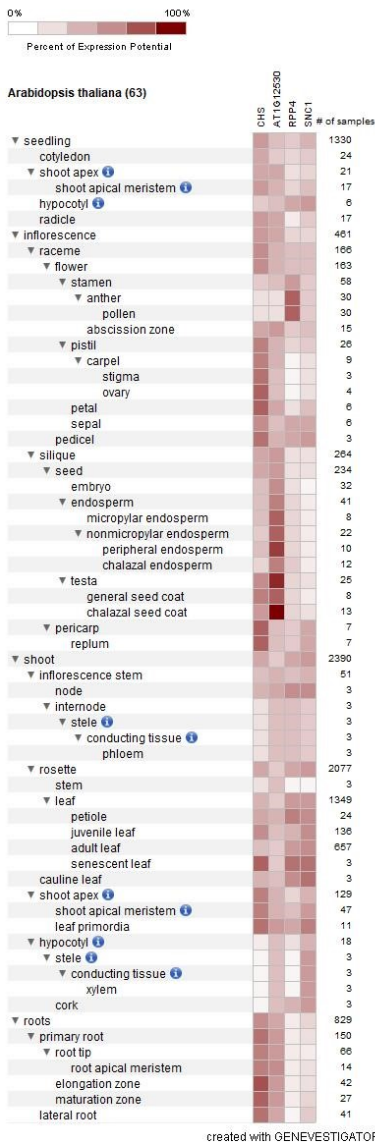**B.**

Dataset: 86 perturbations from data selection: AT\_AFFY\_ATH1-0  
Showing 4 measure(s) of 4 gene(s) on selection: AT-0

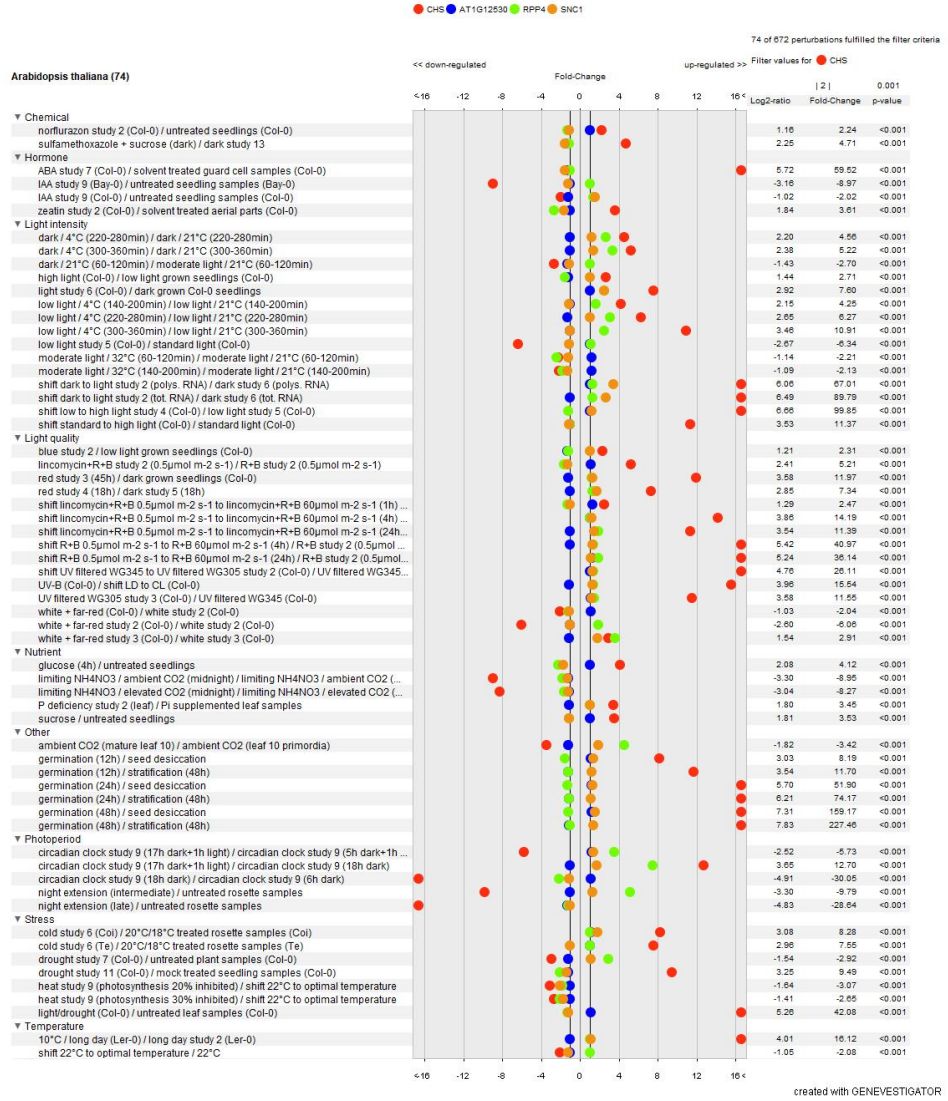**C.**

Dataset: 14 perturbations from data selection: AT\_AFFY\_ATH1-0  
Showing 4 measure(s) of 4 gene(s) on selection: AT-0

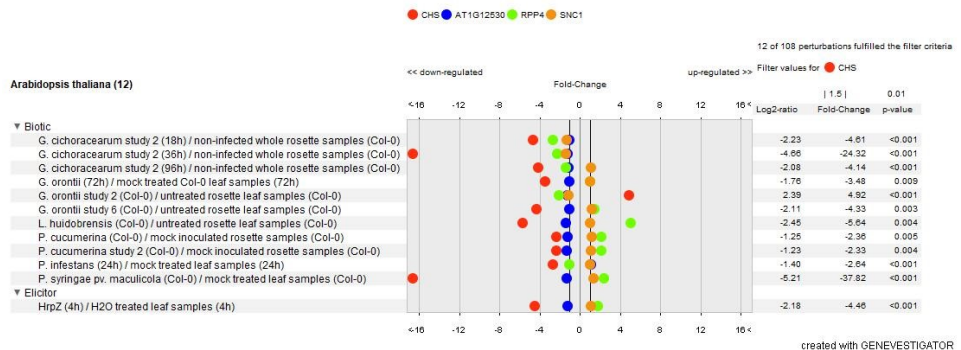**D.**

Dataset: 2 perturbations from data selection: AT\_AFFY\_ATH1-0  
Showing 4 measure(s) of 4 gene(s) on selection: AT-0

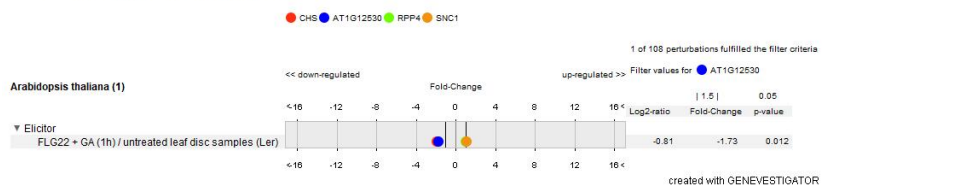

Supplement: Fig._S2_-_Genevestigator.pdf [file Fig._S2_-_Genevestigator.pdf]
