# Supplementary material for: Identification of MOS9 as an interaction partner for chalcone synthase in the nucleus
Source: PeerJ. 2018 Sep 19;6:e5598. doi: 10.7717/peerj.5598 (PMC6151112; doi:10.7717/peerj.5598)
Supplement: Supplemental Information 6 [file peerj-06-5598-s006.xlsx]

## Sheet: Metabolite features
Table S3. Metabolite features associated with the de35S::MOS9::YFP genotype
EMRTa	p(corr)b	Ratio of Changec	Genotype with Higher Peak Area	Average Peak Area		MS/MS Fragmentsd	Collision Energy	MS2Te	Detected m/z	Theoretical m/zf	Iong	Proposed Formula [M]h	Identification Reference	ID	Notes
				WT	de35S-CSI-YFP
3.77_669.1270	0.9	4.95196	WT	254.289	51.3513	596.0997; 523.0712; 450.0423; 271.0234; 151.0039	Ramp 5-40	ATH69n06720	669.127	669.127	[M-H]-2	C63H56O33		Quercetin rhamnoside triflavonoid	Theoretical mass [M-H]- 1339.2626; additional isomer peaks present, but under peak detection minimum
4.35_307.0847	0.95	6.35339	WT	346.681	54.5662	227.1282; 96.9594; 137.9706	Ramp 15-40	ATH17n02221	307.085	307.085	[M-H]-	C12H20O7S		UNK sulfur containing	96.9594 - HSO4 fragment/neutral loss 79.9577 - SO3 loss
4.52_352.1027	-0.91	-1.79	de35S::MOS9::YFP	89.5176	160.32	223.0618; 205.0510; 179.0701; 164.0474	Ramp 15-30	ATH12n02284	352.103	352.103	[M-H]-	C16H19NO8	Nishiyama et al. 2010	Sinapoyl glutamate isomer b	Isomer a and b found. Isomer a was under peak detection limit.
5.23_446.0843	0.96	12.1457	WT	208.928	17.2019	373.053; 300.0272; 269.0100; 152.0130; 151.0021	Ramp 5-40	ATH69n13291	446.084	446.085	[M-H]-2			Quercetin rhamnoside biflavonoid	Carries double charge, predominat form of the metabolite detected. Additional isomers present, but under peak detection limit
5.23_893.1770	0.97	9.25774	WT	153.499	16.5806	893.1170; 747.1193; 601.0614; 178.9990	Ramp 25-50	ATH69n08820	893.177	893.178	[M-H]-	C42H38O22	Routaboul et al. 2006	Quercetin rhamnoside biflavonoid
5.61_595.2021	0.97	5.13378	WT	166.545	32.441	595.2015; 389.1598; 358.1393; 343.1161; 285.0370	Ramp 5-45	ATH60n11076	595.202		[M-H]-			UNK6
5.62_556.2656	-0.9	-2.5	de35S::MOS9::YFP	128.881	321.392	376.1867; 179.0702; 164.0474; 149.0250; 58.2579	Ramp 15-40	ATH69n05783	556.266	556.266	[M-H]-	C29H39N3O8	Respect (Swada et al. 2012)	N,N-Bis(sinapoyl) spermidine	PM008010
5.77_494.0788	-0.95	-2.8	de35S::MOS9::YFP	14700.6	41304.9	494.0806; 372.0429; 274.9908; 259.0131; 241.0016; 209.9902; 138.9701; 121.0292; 96.9596; 79.9565	Ramp 25-50	ATH69n54324	494.079	494.079	[M-H]-	C18H25NO11S2	KNApSAcK (Afendi et al 2012)	4-Benzoyloxybutyl glucosinolate	C0000759
5.76_989.1641	-0.93	-9.6	de35S::MOS9::YFP	49.5241	476.054				989.164	989.166	[2M -H]-			4-Benzoyloxybutyl glucosinolate	Adduct
5.76_1011.1463	-0.94	-5.1	de35S::MOS9::YFP	256.446	1306.32				1011.15	1011.15	[2M+Na]-			4-Benzoyloxybutyl glucosinolate	Adduct
5.76_1034.2217	-0.94	-7.5	de35S::MOS9::YFP	33.3369	250.418	1034.2236; 989.165; 909.2139; 574.0346; 494.0792	Ramp 5-40	ATH69n14598	1034.22	1034.16	[2M + Formate]-			4-Benzoyloxybutyl glucosinolate	Adduct
5.77_562.0656	-0.97	-2.1	de35S::MOS9::YFP	950.353	1954.29				562.066	562.067	[M+NaFormate]-			4-Benzoyloxybutyl glucosinolate	Adduct
5.92_447.0922	0.97	4.12248	WT	2908.95	705.632	300.0267; 271.0245; 255.0293; 243.0286; 151.0037; 107.0130	Ramp 5-20	ATH69n32484	447.092	447.093	[M-H]-	C21H20O11	Respect (Swada et al. 2012)	Quercetin rhamnoside	PT204350
5.92_515.0794	0.96	5.75052	WT	205.623	35.7572				515.079	515.08	[M+NaFormate]-			Quercetin rhamnoside	Adduct
6.00_579.2068	0.94	3.05615	WT	241.137	78.9023	535.2725; 417.1544; 387.1066; 299.1848; 181.0502; 166.0261; 151.0021	Ramp 10-50	ATH67n10870	579.207	580.216	[M-H]-	C28H36O13	König et al 2014	Syringaresinol hexoside
6.40_591.1711	-0.91	-1.5	de35S::MOS9::YFP	5140.84	7882.63	591.1716; 367.1021; 349.0920; 295.0814; 277.0708; 223.0606; 208.0368; 205.05; 190.0266; 175.0031; 164.0473; 149.0239	Ramp 10-50	ATH69n05816	591.171	591.172	[M-H]-	C28H31O14	Stehle, et al 2008	Disinapoyl glucose
9.91_855.4731	0.9	3.1	WT	118.848	38.9464	809.4687; 563.3102; 545.2979; 327.2179; 263.1649; 253.0928	Ramp 5-20	ATH01n04065 [M-H]-	855.743		[M+Formate]-			UNK glycerolipid 1	Diagnostic glycerol galactose fragment 253.0923
10.16_855.4741	0.93	3.15122	WT	225.472	71.5506	809.4694; 527.2836; 299.1851; 291.1957; 253.0920	Ramp 5-20	ATH01n04599	855.474		[M+Formate]-			UNK glycerolipid 2	Diagnostic glycerol galactose fragment 253.0924
10.22_957.4696	0.9	2.58868	WT	117.378	45.3428	911; 893.4499; 689.3409; 619.2590; 397.1349; 291.1949; 239.1273	Ramp 5-30	ATH1n05001	957.47		[M+Formate]-			UNK glycerolipid 3	Diagnostic glycerol galactose galactose fragment 397.1346
10.38_767.3841	0.95	3.18771	WT	211.709	66.4142	721.37; 675.3585; 415.1440; 397.1337; 277.2161; 235.0809	Ramp 5-45		767.384		[M+Formate]-			UNK glycerolipid 4	Diagnostic glycerol galactose fragment 253.0923
10.41_783.3788	0.93	2.4742	WT	191.816	77.5265	737.3744; 475.2144; 307.1893; 221.1175	Ramp 15-50		783.379		[M+Formate]-			UNK 7
10.74_981.5046	0.91	5.01895	WT	325.232	64.8008	935.5002; 689.3380; 397.1350; 291.1962; 263.1647	Ramp 15-50	ATH01n05005	981.505	981.506	[M+Formate]-	C49H76O17	Hisamatsu et al. 2005	Arabidopside C
11.36_819.4523	0.92	2.9	WT	8536.65	2975.44	773.4479; 527.2856; 291.1958; 263.1647; 253.0921	Ramp 15-50	ATH01n04098	819.452	819.453	[M+Formate]-	C43H66O12	Zhao et al. 2012	Arabidopside A (isomer a)	Predominant isomer
11.36_809.4229	0.91	2.5805	WT	306.979	118.961	291.196	Ramp 15-50	ATH01n04100	809.423	809.424	[M+Cl]-			Arabidopside A (isomer a)	Adduct
11.36_877.4694	0.92	2.85653	WT	284.399	99.5608						?				Unknown adduct; Peak overlaps with 819 and 809
11.70_819.4523	0.9	2.92352	WT	209.475	71.6515	773.4473; 527.2854; 291.1953; 263.1643; 253.0907	Ramp 15-50	ATH01n04107	819.452	819.453	[M+Formate]-	C43H66O12	Zhao et al. 2012	Arabidopside A (isomer b)
aEMRT- Exact Mass Retention Time as detected by UPLC-MS and listed as Retention Time_Exact Mass.
bp(corr) is the correlation factor between the EMRTand the genotype as determined by the MarkerLynx software package. Features with a value >0.90 were selected as features of interest in this study with negative values being higher in de35S-CSI-YFP and positive values being higher in WT.
c Ratio of Change was calculated by dividing the average peak areas from each genotype. Negative numbers were higher in de35S-CSI-YFP and positive numbers were higher in WT.
dMS/MS fragments lists the fragments observed after targeting the mass for MS/MS analysis.
eMS2T accession codes that match the ions presented in this study (Matsuda et al. 2009)
fCalculated exact mass of the m/z based upon the proposed compound formula and adduct assignment.
gIon refers to the deduced charge state or adduct form of the proposed compound
hProposed formula for the molecule based on putative compound identification.
Supplemental References
Afendi FM, Okada T, Yamazaki M, Hirai-Morita A, Nakamura Y, Nakamura K, Ikeda S, Takahashi H, Altaf-Ul-Amin M, Darusman LK, Saito K, and Kanaya S. 2012. KNApSAcK family databases: Integrated metabolite–plant species databases for multifaceted plant research. Plant and Cell Physiology 53:e1. 10.1093/pcp/pcr165
Hisamatsu Y, Goto N, Sekiguchi M, Hasegawa K, and Shigemori H. 2005. Oxylipins arabidopsides C and D from Arabidopsis thaliana. Journal of Natural Products 68:600-603. 10.1021/np0495938
König S, Feussner K, Kaever A, Landesfeind M, Thurow C, Karlovsky P, Gatz C, Polle A, and Feussner I. 2014. Soluble phenylpropanoids are involved in the defense response of Arabidopsis against Verticillium longisporum. New Phytologist 202:823-837. 10.1111/nph.12709
Matsuda F, Yonekura-Sakakibara K, Niida R, Kuromori T, Shinozaki K, and Saito K. 2009. MS/MS spectral tag-based annotation of non-targeted profile of plant secondary metabolites. The Plant Journal 57:555-577. 10.1111/j.1365-313X.2008.03705.x
Nishiyama Y, Yun C-S, Matsuda F, Sasaki T, Saito K, and Tozawa Y. 2010. Expression of bacterial tyrosine ammonia-lyase creates a novel p-coumaric acid pathway in the biosynthesis of phenylpropanoids in Arabidopsis. Planta 232:209-218. 10.1007/s00425-010-1166-1
Routaboul J-M, Kerhoas L, Debeaujon I, Pourcel L, Caboche M, Einhorn J, and Lepiniec L. 2006. Flavonoid diversity and biosynthesis in seed of Arabidopsis thaliana. Planta 224:96-107. 10.1007/s00425-005-0197-5
Sawada Y, Nakabayashi R, Yamada Y, Suzuki M, Sato M, Sakata A, Akiyama K, Sakurai T, Matsuda F, Aoki T, Hirai MY, and Saito K. 2012. RIKEN tandem mass spectral database (ReSpect) for phytochemicals: A plant-specific MS/MS-based data resource and database. Phytochemistry 82:38-45. http://dx.doi.org/10.1016/j.phytochem.2012.07.007
Stehle F, Brandt W, Schmidt J, Milkowski C, and Strack D. 2008. Activities of Arabidopsis sinapoylglucose:malate sinapoyltransferase shed light on functional diversification of serine carboxypeptidase-like acyltransferases. Phytochemistry 69:1826-1831. http://dx.doi.org/10.1016/j.phytochem.2008.03.021
Zhao H, Wang J, Xie C, Song S, Bai G, and Luo G. 2012. Study on fingerprints of different organs of Arabidopsis thaliana by using UPLC/ESI-Q-TOF MS. Asian Journal of Chemistry 25:3023-3029.
